# Supplementary material
Source: Springer Nature journal article supplement (https://www.springermedizin.de/resource/supplementary/13041_2013_215_MOESM7_ESM.pdf/25657760)

A

## Input-Output

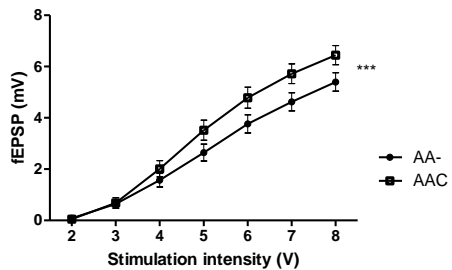

B

## Paired Pulse Facilitation

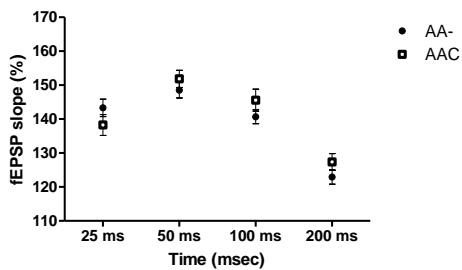

C

## Synaptic Fatigue

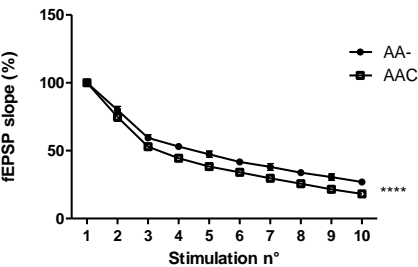

D

## L-LTP

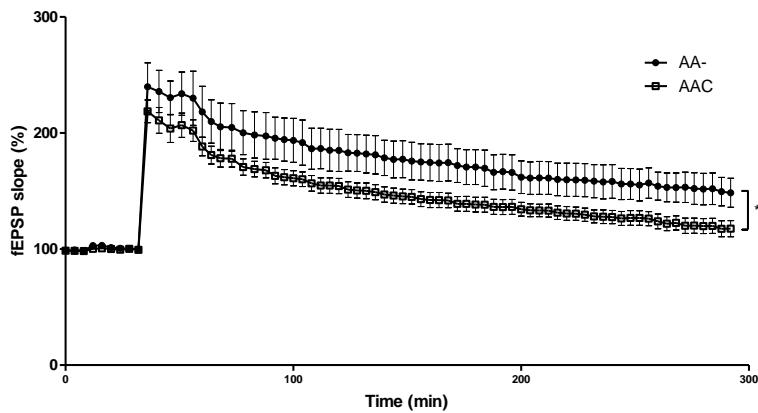

Supplement: MOESM7 [file 25657760]
